# Supplementary material for: Thermal Percolation Behavior in Thermal Conductivity of Polymer Nanocomposite with Lateral Size of Graphene Nanoplatelet
Source: MDPI journal article supplement (doi:10.3390/polym14020323), 2022-01-13
Supplement: s1 [file s1]

# Thermal Percolation Behavior in Thermal Conductivity of Polymer Nanocomposite with Lateral Size of Graphene Nanoplatelet

Ji-un Jang <sup>1,†</sup>, Hae Eun Nam <sup>2,†</sup>, Soon Oh So <sup>2</sup>, Hyeseong Lee <sup>2</sup>, Geon Su Kim <sup>2</sup>, Seong Yun Kim <sup>2,\*</sup> and Seong Hun Kim <sup>1,\*</sup>

<sup>1</sup> Department of Organic and Nano Engineering, Hanyang University, 222 Wangsimni-ro, Haengdang-dong, Seongdong-gu, Seoul 04763, Korea; jju204@hanyang.ac.kr (J.-u.J.)

<sup>2</sup> Division of Polymer-Nano & Textile Engineering, Jeonbuk National University, 567 Baekje-daero, Deokjin-gu, Jeonju-si 54896, Jeonbuk, Korea; hae\_eun1912@naver.com (H.E.N.); tnsdh0626@naver.com (S.O.S.); dlgtjd6715@naver.com (H.L.); kuean88@naver.com (G.S.K.)

\* Correspondence: sykim82@jbnu.ac.kr (S.Y.K.); kimsh@hanyang.ac.kr (S.H.K.); Tel.: +82-63-270-2336 (S.Y.K.); +82-2-2281-0496 (S.H.K.)

† The first two authors contributed equally.

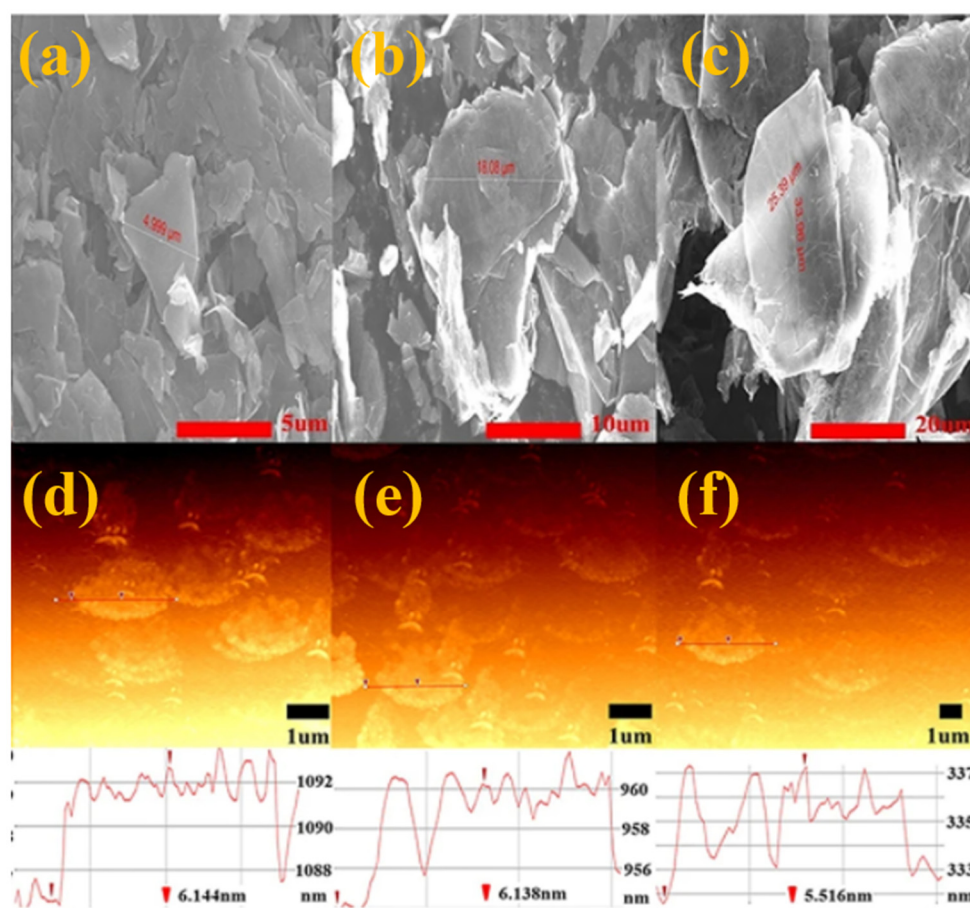

**Figure S1.** FE-SEM images of (a) M5, (b) M15 and (c) M25, and atomic force microscopy results of (d) M5, (e) M15 and (f) M25 (Reproduced with permission [13]. Copyright 2016, Nature Publishing Group).

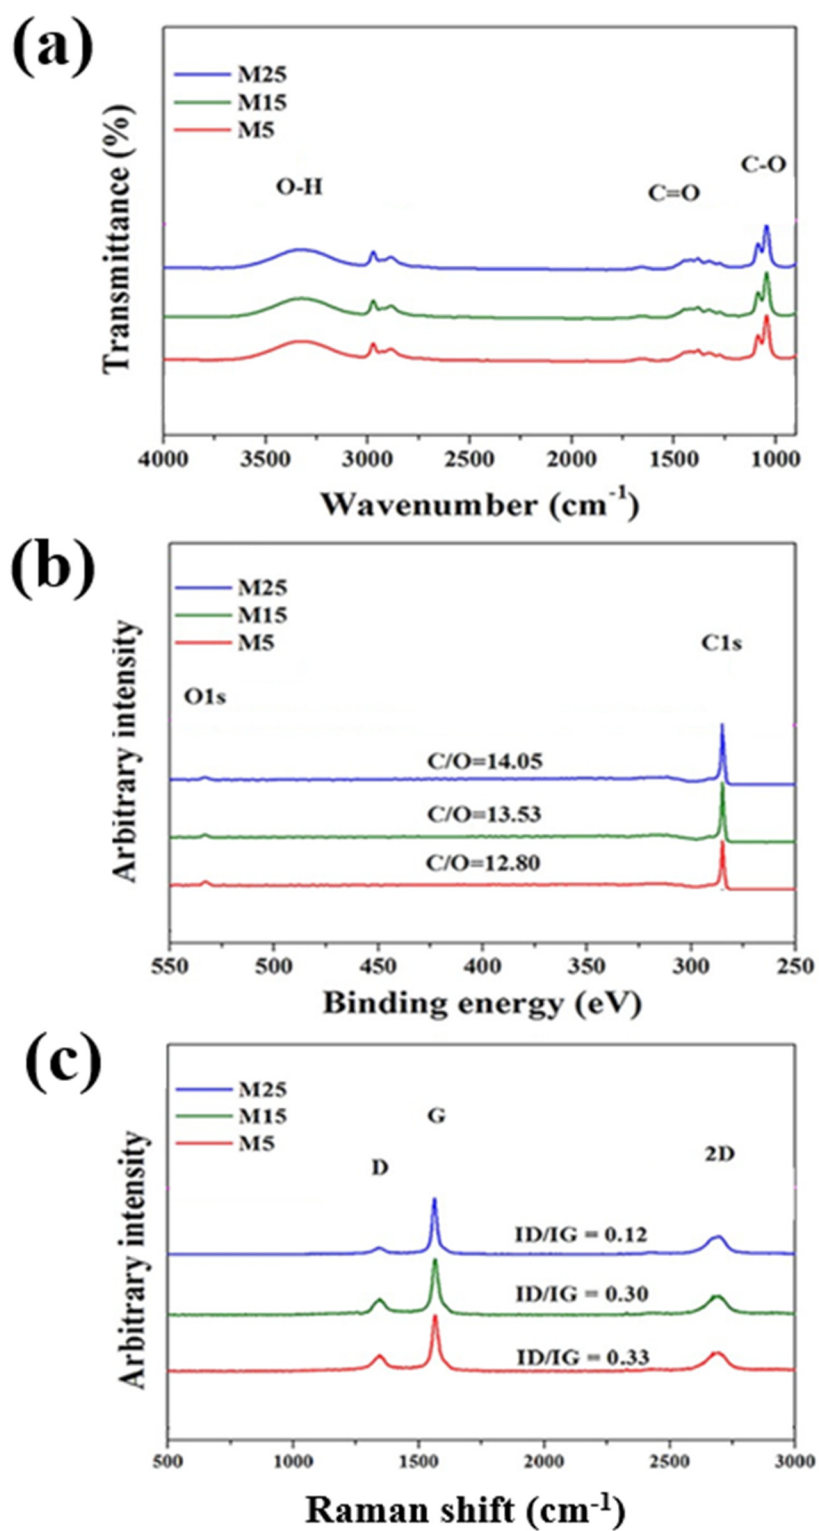

**Figure S2.** (a) FT-IR, (b) X-ray photoelectron and (c) Raman spectra of GNPs (Reproduced with permission [13]. Copyright 2016, Nature Publishing Group).

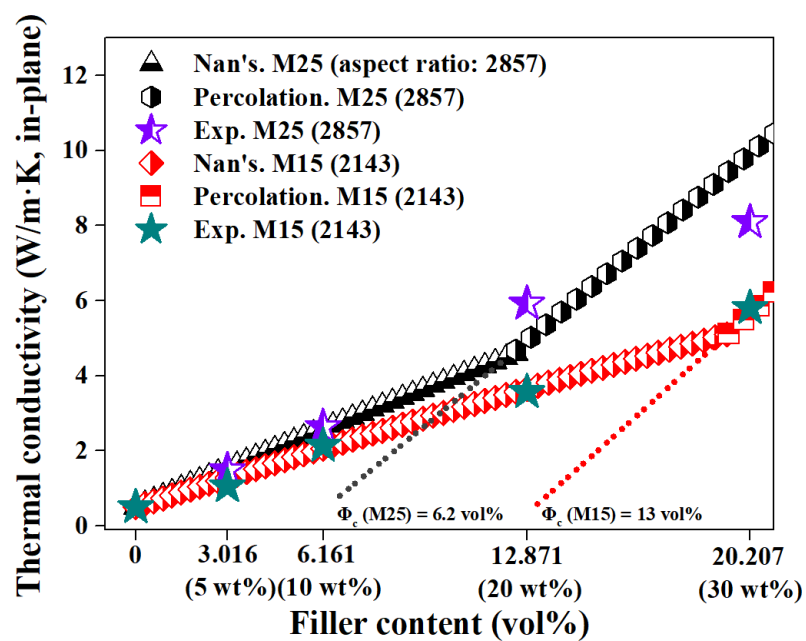

**Figure S3.** Thermal conductivity of the fabricated composites considering the critical volume fraction based on the experimental results.

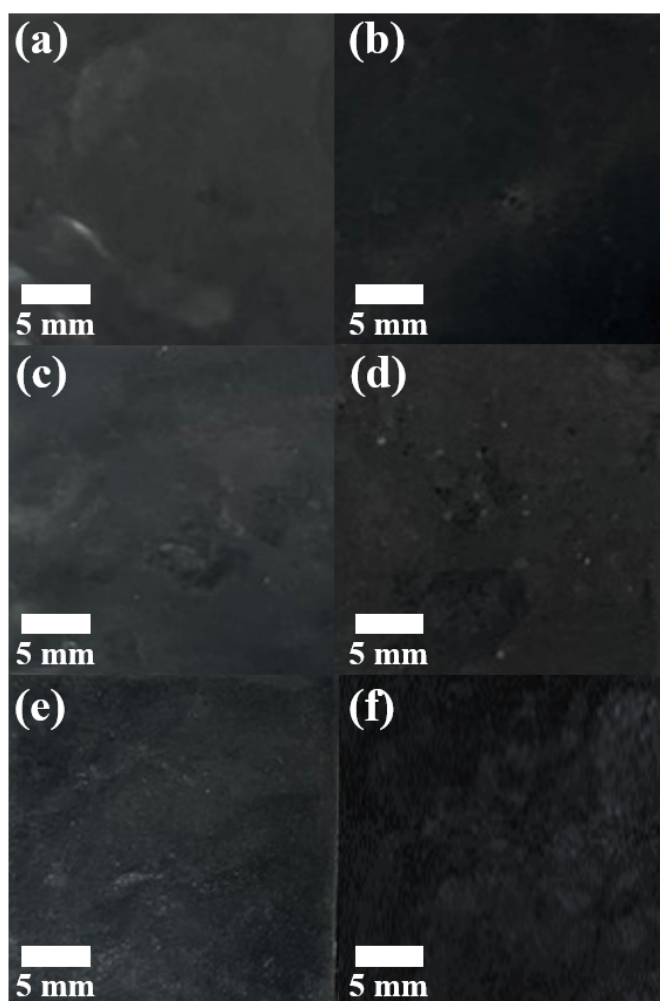

**Figure S4.** Surface photos of the fabricated composites with M5 (a) 10 wt.% and (b) 30 wt.%, and M15 (c) 10 wt.% and (d) 30 wt.%, and M25 (e) 10 wt.% and (f) 30 wt.%.

**Table S1.** In-plane thermal conductivities of composites with GNP fillers.

| Filler type  | In-plane thermal conductivity (W/m·K) | Enhancement (%) | Loading  | Matrix | Ref.      |
|--------------|---------------------------------------|-----------------|----------|--------|-----------|
| GNP (M25)    | 8.094                                 | 1518.8          | 30 wt.%  | pCBT   | This work |
| GNP (M25)    | 7.10                                  | 857             | 20 wt.%  | pCBT   | [25]      |
| GNP (M25)    | ~ 7                                   | ~ 3500          | 50 wt.%  | pCBT   | [26]      |
| GNP (M25)    | ~ 6                                   | ~ 2500          | 20 wt.%  | pCBT   | [13]      |
| GNP (8 µm)   | 5.82                                  | 2430            | 30 vol.% | PBT/PC | [27]      |
| GNP (M5)     | 1.98                                  | 1320            | 20 wt.%  | pCBT   | [22]      |
| GNP (0.5 µm) | 1.09                                  | 445             | 20 wt.%  | PP     | [28]      |
